# Supplementary material for: The Response of the Honey Bee Gut Microbiota to Nosema ceranae Is Modulated by the Probiotic Pediococcus acidilactici and the Neonicotinoid Thiamethoxam
Source: MDPI journal article supplement (doi:10.3390/microorganisms12010192), 2024-01-18
Supplement: s1 [file s1]

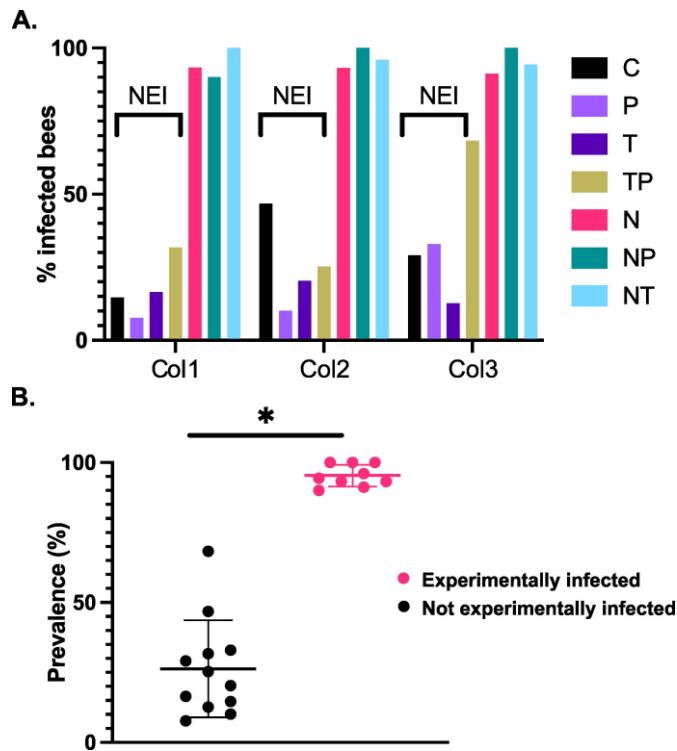

**Figure S1. Prevalence of *Nosema ceranae* with or without experimental infection** (A) Black and pink points represent all the replicates in not experimentally infected (NEI)  $n=12$  and experimentally infected conditions  $n=9$  (all groups included) respectively. Mann-Whitney U test,  $p$ -value  $< 0.0001$  (B) Prevalence of *N. ceranae* per colony and per treatments; Control (C), *P. acidilactici* (P), Thiamethoxam (T), Thiamethoxam/*P. acidilactici* (TP), *N. ceranae* (N), *N. ceranae*/*P. acidilactici* (NP), *N. ceranae*/Thiamethoxam (NT)
