# Supplementary material for: The Response of the Honey Bee Gut Microbiota to Nosema ceranae Is Modulated by the Probiotic Pediococcus acidilactici and the Neonicotinoid Thiamethoxam
Source: Microorganisms. 2024 Jan 18;12(1):192. doi: 10.3390/microorganisms12010192 (PMC10819737; doi:10.3390/microorganisms12010192)
Supplement: Supplementary file 1 [file microorganisms-12-00192-s001.zip › TablesS1-S2.xlsx]

## Sheet: SPECIES WITH TRESHOLD
Species highlighted in grey do not meet the conditions for inclusion in analyses.
#mpa_vJan21_CHOCOPhlAnSGB_202103	N	N	N	NT	NT	NT	NP	NP	NP	P	P	P	C	C	C	T	T	T	TP	TP	TP
clade_name	I1_R1_R2	I2_R1_R2	I3_R1_R2	II1_R1_R2	II2_R1_R2	II3_R1_R2	IP1_R1_R2	IP2_R1_R2	IP3_R1_R2	P1_R1_R2	P2_R1_R2	P3_R1_R2	S1_R1_R2	S2_R1_R2	S3_R1_R2	SI1_R1_R2	SI2_R1_R2	SI3_R1_R2	SIP1_R1_R2	SIP2_R1_R2	SIP3_R1_R2
UNCLASSIFIED	20.78672	26.77966	23.19937	25.24925	27.12226	30.05134	22.07737	26.99913	24.41605	19.21293	26.19909	23.47431	22.30016	24.05052	19.32199	19.92777	22.50315	25.31695	22.4358	19.29694	21.964
Bartonella_apis	56.0620841518716	55.6071576613186	60.2170062833289	44.9648190833951	54.2842740156854	41.0411305023532	50.9080432264384	42.9486651549796	44.8590814638482	60.8129952460054	50.5926198223732	61.4748523630224	56.3436760790712	50.4948439977227	62.5931196583947	63.2314954615505	49.688869798312	55.3430645563639	56.1546058582484	56.4606747596464	57.1481033293492
Snodgrassella_alvi	5.49210247312611	3.44640084509207	2.50580478203797	4.27535423754586	1.6074788701655	2.8428463986868	3.38487312161361	6.80903896848947	1.90830575977747	4.96185323370157	2.22422658890667	1.69981152433331	3.38375046982649	1.94498261173953	1.89456969373924	2.25117472524613	4.3823846488789	1.9765316184662	4.6958764601647	2.38414589195385	0.984580202513074
Proteus_mirabilis	3.09792060041307	1.10272028127575	1.64102204034768	2.07472203651263	0.857552357744296	2.90349188592194	1.70494703827458	1.86601893462595	8.31388673607396	0	0.0616606603921775	0.0469714668735695	0.102221913662856	0.121147013889145	0.0688828819242162	0.0259514100814272	1.12427774495741	1.13240408773953	0	0.43028449648741	2.94352569523764
Lactobacillus_apis	3.02300067733041	0.884179533513506	1.29635618585636	4.04366428567483	2.12917416658026	4.78163436101932	1.93775646543422	2.82857915246849	2.01329942374051	1.6051745353802	1.48712523905753	0.803458496251191	2.39094849381875	2.21311465226002	1.36722597224773	2.5938358307767	2.09917256939289	0.917652989374125	2.70758016974793	1.31254647156096	1.31415744173743
Frischella_perrara	2.26249771101646	2.88032707720093	3.11554032104984	2.22873848330569	1.09221867812643	1.04327725209141	3.37598994234655	0.532023010831109	4.08662006161468	3.23254935876005	2.38651479022611	1.72083313063857	1.8722865007492	1.99475990024993	0.388698567372548	1.7028320798323	0.286947572015235	0.668659714482706	1.53588756406237	1.10649542284636	1.32864092319787
Bifidobacterium_coryneforme	1.88379484754257	1.06289573853849	1.78193583102923	2.94260815272604	2.67801642086532	3.33949586635333	3.55864057569735	2.07618842764627	1.27846471031809	1.39217133545351	3.24058320249962	1.68240193046929	1.50162716893308	3.3732201585308	2.56642386042008	1.15533820006754	2.87785312921461	3.93691676241786	2.60103022420075	2.2819919606273	2.03730143956957
Gilliamella_apicola	1.75305332391396	2.07975784953716	2.24190246704998	2.05487571219524	1.11779147682894	2.72575933861427	3.78499021723209	2.14764897530781	2.72792298912196	0.497325228987606	1.79674219721828	2.08498061372407	1.22015948708168	1.34622729941023	1.58115177420399	0.917195377718966	1.79615215149871	2.98911422743076	1.35157174867053	1.76796190043507	1.36908698160815
Gilliamella_apis	1.74277936110594	2.25293859688438	1.34971726159515	2.05678185633872	2.86616488028476	2.79975802482655	4.29267949686968	5.98121644889895	1.89528264531427	1.57297280759033	2.08952516778422	0.501036632553473	1.11775109379524	6.58690843650607	2.46859370977437	0.708839425318836	4.85923049255161	1.55630505603098	1.63454923017288	1.85421732925623	5.4540374342476
Apilactobacillus_kunkeei	0.901985811120408	1.46248842016066	0.784848648960096	1.83552710926885	1.81937089703229	1.56292583879243	0.970066552750646	1.5068984747565	1.96483499545378	2.71560902814831	0.97399489119306	0.433617502029499	1.03798443480596	2.17327915054549	1.15599481570758	1.2639481742559	3.58674777913282	0.893448214211464	1.22606511193042	1.40786485384077	0.974622809009018
Bifidobacterium_asteroides	0.821964552611096	0.516371801334699	0.426896285973079	1.83373309125146	1.16325989834646	1.32851389320723	1.6335231600624	1.16545882461596	2.6052351226294	1.3760462354363	1.87798961915215	2.0386902254676	1.9471969195409	1.66123535834485	1.90805905642104	1.49211399661636	1.10309010723657	1.18022364200257	1.42618075545646	1.38817330759044	1.23953161565648
Lactobacillus_melliventris	0.671847459955189	0.411747258004558	0.27352543356897	1.47973596104476	1.07907882173982	0.365027076282041	0.438416065879538	0.431792821905477	1.13510463369387	0.775967926729834	2.6849878109611	0.745321931598453	2.69458394092403	1.2206752157414	0.890806208440189	1.60218929263283	2.71066143346133	1.0773104048099	1.52695216788632	0.915188822901989	0.174059296322851
Lactobacillus_helsingborgensis	0.465290903145762	0.186338442382864	0.181449161687505	1.20857761279111	0.357771397521738	0.131888196288165	0.370264937923644	0.187539224581171	0.222957533624778	0.431491842193909	1.08494717944392	0.660577385466503	1.97720459896975	0.248256061876652	0.688247937595577	1.34852046468479	0.906023377315827	0.329807798814635	0.593179998228588	0.224959775298433	0.39381647380538
Klebsiella_oxytoca	0.310112081704718	0.257098578623503	0.0284546323563958	0.376063551820611	0.0508686619958798	0.0872189827375832	0.40449634715189	2.29749055272132	0.418130407489414	0	0.0119409872548824	0.182452543694956	0.0416393459500796	0.333570111592455	0.678792475237275	0	0	0.0530847089960469	0.25799405174276	0.0142360195022936	0.387222431868917
Fructobacillus_fructosus	0.231532504946415	0.175003933804583	0.413279534780666	0.389884965629598	0.416080876694952	0.700353952010408	0.265287577322021	0.481725414203461	0.775181425555077	0.86813789972398	0.501300061974751	0.740829873753098	0.415733010833926	0.758287192884843	0.772128860922595	0.348266161703671	0.556256861860521	0.67684497630877	0.158727384849493	0.241253722790004	0.284519253258513
Lactobacillus_kullabergensis	0.113362129333475	0.0835956617818054	0.0272104621966829	1.79160356814305	0.513000982122346	0.244918234146582	0.160325801245427	0.121473440912055	0.103285466709017	0.150393217394952	1.73675681748547	0.224335052362119	0.209711876692041	0.267501659845124	0.11411904015203	0.407383489883608	0.280631579058948	0.103450955122853	0.408127322909041	0.075917367039726	0.0733226248934996
Blautia_sp_LZLJ_3	0.0964025654383617	0.151185357315469	0.176188318728225	0.148649342891027	0.129671361445944	0.312740453781164	0.0476107239664429	0.191992277403067	0.529518473562652	0.0369924012919793	0.301270075227943	0.606611470772398	0.0778630128318246	0.20356738845657	0.739478471704124	0.0275128185867893	0.0274648822540846	0.144429542385277	0.127019138696994	0.281064541500216	0.297621497532267
Enterococcus_faecalis	0.0656994969388473	0.0400808139260403	0.270522529047688	0.268863500206399	0.0964026734787247	0.217757169909672	0.261858981815436	0.405162106013219	0.295956511852052	0.0906027037539962	0.090634897699142	0.224801859054737	0.10599812604049	0.0344278988125819	0.287270177638272	0.171810986151553	0	0.329501598326616	0	0.300812579891437	0.297925837929334
Morganella_morganii	0.0484389225682483	0	0.0287925551158239	0.0141876924875374	0	0.0253144196428994	0.0542263548416491	0.0028178334250032	0.0163336914422383	0	0.0159926572196108	0	0	0	0	0	0	0.0975958043275663	0	0.0149865579454418	0
Gottschalkia_acidurici	0.0321843568920348	0.0095259661888524	0.0034637082841388	0.0119526450408705	0.0069306730025905	0.0077433165362502	0	0	0	0	0	0	0.0349105395323209	0	0	0	0	0.0044287046193944	0	0	0
Bombilactobacillus_mellis	0.0288257136918815	0.018759051019093	0.0142772365858406	0.296184899596257	0.112501366078853	0.2494369175092	0.274981151890639	0.0831625864705607	0.16051763311375	0.134106543229276	0.292672269200787	0.413146880672901	0.310550733146628	0.214215505406766	0.131698777761877	0.354183499577837	0.250756544891483	0.128439902267025	0.280363567864043	0.111321798761133	0.0836701983937955
Serratia_marcescens	0.0252452732992653	0	0	0.0102259026991313	0	0	0	0.21684907225316	0	0	0	0	0	0	0	0	0	0	0	0	0
Apilactobacillus_apinorum	0.01958944489146	0.463711733056277	0	0.0622823255037733	0.346183836981129	0.166253972388072	0.003444180031615	0.39784741924676	0.0257061011545824	0.0911601345662143	0.0948415495750895	0	0.023325492916988	0.668294655265103	0	0.0075988547260951	0.158558547098919	0	0.0721657343940424	0.227090336040273	0.0051269651505991
Arsenophonus_endosymbiont_of_Apis_mellifera	0.019367647698997	0.0197035934006164	0	0	0	0.0351981651403896	0	0.0536921368935195	0.0192209983052346	0	0.022029571666146	0.195852191543705	0.0600775187322291	0.0003113928637361	0.0098911235932407	0.0415094445733165	0	0	0.0085863572629197	7.81850422777926	0
Lactobacillus_kimbladii	0.016048611140355	0.0044737627527969	0	0.0402159038898584	0.026410892703878	0.0094290792148738	0.00688836006323	0.0043581516961837	0.0187145858449709	0.0207218845411502	0.0867382096456328	0.0132925118865086	0.134102159311891	0.0583975543723677	0.183760295337066	0.121037184446422	0.0324091810345886	0.0169231781914803	0.0334069021963822	0.0029133804083492	0.022926976579087
Parasaccharibacter_apium	0.0134028874874041	0	0	0	0	0.0049523650475746	0	0.0028251335115964	0	0	0	0	0	0	0	0.0186568298333	0.002069165790587	0	0	0	0
Anaerosalibacter_massiliensis	0.0072876220380684	0	0	0	0	0	0	0	0	0	0	0	0	0	0	0	0	0	0	0	0
Paenibacillus_sp_79R4	0.0050617287851366	0.0017280000158102	0	0	0	0	0	0	0	0	0	0	0.0375523341998012	0	0	0	0.0439329620480829	0	0.0021795541019696	0.0005972026321823	0
Bombilactobacillus_mellifer	0.0023843198189767	0.0038147796959201	0.0036096294757101	0.0275307014918863	0.0173813408109131	0.0201102394234142	0.0060701724991586	0.0267037167581909	0.0396815733788761	0.0181770917027634	0.0395277674518854	0.0316357191357667	0.030722517985933	0.0112936875213565	0.0189270603178977	0.0185927720484647	0.0209783962364015	0.0179164627013951	0.0116966817998942	0.014219878890613	0.0125559922790166
Providencia_alcalifaciens	0	0.0558890852571184	0	0	0	0.162364826955231	0	0.171990040137501	0.0932176846631769	0	0.0692326337688829	0	0	0.0152658452709661	0.006881833951904	0	0.526691815077414	0.227902782741048	0	0	1.08686198672753
Providencia_rettgeri	0	0.0394511190050247	0	0.296386726623213	0	0	0	0	0	0	0	0	0	0	0.050270465831552	0	0	0.531235441798932	0.647886030545998	0	0
Entomomonas_moraniae	0	0	0.0188238337126926	0.0008446834831884	0	2.78144546593594	0.0657121497887092	0.0184108183882333	0.0180872390658381	0.0026175012051979	0.0113062994279851	0	0	0	0.0509481610859013	0.060574642784942	0	0.0132861138581833	0	0.0388908038444179	0.0032697083684947
Tissierellaceae_bacterium_BX21	0	0	0	0.0015398654649276	0.0038989590498274	0	0	0	0	0	0	0	0	0	0	0	0	0	0	0	0
Virgibacillus_proomii	0	0	0	0.0011735867863769	0	0.0140037215045826	0	0	0	0	0	0	0.53533637941194	0	0.0003872544310567	0	0	0.007311470189523	0	0	0
Fructobacillus_tropaeoli	0	0	0	0	0.0778625766137508	0.0024761825237873	0	0	0	0	0	0	0	0	0	0	0	0	0	0.0264544625445117	0
Tissierella_sp_DSM_105185	0	0	0	0	0.0249970645624452	0	0	0	0	0	0	0	0	0	0	0	0	0	0	0	0
Anaerocolumna_aminovalerica	0	0	0	0	0.0007797918099654	0	0	0	0	0	0	0	0	0	0	0	0	0	0	0	0
Enterococcus_phoeniculicola	0	0	0	0	0	0.0285530425483049	0	0	0	0	0	0	0	0	0	0	0	0	0	0	0
Schnuerera_ultunensis	0	0	0	0	0	0.0098697557657173	0.0013948149901789	0	0.0140964065431626	0	0	0	0	0	0	0	0	0	0	0.0002824607044105	0
Enterococcus_casseliflavus	0	0	0	0	0	0.0009932709558695	0	0	0	0	0	0	0	0	0	0	0	0	0	0	0
Clostridium_jeddahense	0	0	0	0	0	0	0	0	0	0	0	0	0	0	0	0	0	0	0	0	0
Cellulosimicrobium_cellulans	0	0	0	0	0	0	0	0.0105121246943124	0	0	0	0	0	0	0.0267124879422675	0	0	0	0	0	0
Clostridiales_bacterium_mt11	0	0	0	0	0	0	0	0	0.0008465402320826	0	0	0	0	0	0	0	0	0	0	0	0
Clostridium_sp_C105KSO13	0	0	0	0	0	0	0	0	0	0	0.0133579647288858	0	0	0	0	0	0	0	0	0	0
Anaerosalibacter_bizertensis	0	0	0	0	0	0	0	0	0	0	0	0.0001836616495545	0	0	0.007446579997195	0	0	0	0	0	0
Cytobacillus_horneckiae	0	0	0	0	0	0	0	0	0	0	0	0	0.0884224215174298	0	0	0	0	0	0	0	0
Oceanobacillus_neutriphilus	0	0	0	0	0	0	0	0	0	0	0	0	0.0044910509347165	0	0	0	0	0	0	0	0
Proteus_penneri	0	0	0	0	0	0	0	0	0	0	0	0	0	0	0.0176039410117872	0	0	0.329240207666113	0	0	0.0934559126995052
Tissierella_sp_P1	0	0	0	0	0	0	0	0	0	0	0	0	0	0	0.0084147160748369	0	0	0	0.0859799189335727	0	0
Klebsiella_grimontii	0	0	0	0	0	0	0	0	0	0	0	0	0	0	0	0.201677928331042	0	0	0	0	0.0104490202993184
Lactobacillus_panisapium	0	0	0	0	0	0	0	0	0	0	0	0	0	0	0	0	0.146228798886095	0	0	0	0
Paenibacillus_ihbetae	0	0	0	0	0	0	0	0	0	0	0	0	0	0	0	0	0	0	0	0	0
Enterococcus_moraviensis	0	0	0	0	0	0	0	0	0	0	0	0	0	0	0	0	0	0	0	0	0

## Sheet: Sup data Table S1
	Treatment	Comparison	Col1	Col2	Col3	Pool
Single effect	N. ceranae	N vs C	****			**
	Thiamethoxam	T vs C
	P. acidilactici	P vs C
Additional effect	N. ceranae	NT vs T		**		***
		NP vs P	*			***
	Thiamethoxam	NT vs N	***	****
		TP vs P		****		****
	P. acidilactici	NP vs N	***	**
		TP vs T		****		**
Combined treatment	N. ceranae + Thiamethoxam	NT vs C		***		***
	N. ceranae + P. acidilactici	NP vs C		**
	Thiamethoxam + P. acidilactici	TP vs C		****		**

## Sheet: Sup data Table S2 
Table S2. Species showing significant difference in abondance between two conditions. The "x" and "÷" signs indicate an increase and a decrease in abundance respectively, in the first condition compared to the second one.
Comparison	Species	LDA SCORE	Fold difference
P compared to C	Proteus mirabilis	2.8	÷ 2.7
T compared to C	Bifidobacterium asteroides	3.7	÷ 1.5
N compared to C	Proteus mirabilis	3.9	x 20
	Frischella perrara	3.8	x 1.9
	Gilliamella apicola	3.5	x 1.5
	Lactobacillus kimbladii	3.1	÷ 20
	Bombilactobacillus mellis	3.1	÷ 11
	Fructobacillus fructosus	3.3	÷ 2.4
	Bombilactobacillus mellifer	3.1	÷ 6.3
	Lactobacillus kullabergensis	3.1	÷ 2.6
	Lactobacillus melliventris	3.7	÷ 3.6
	Bifidobacterium asteroides	3.8	÷ 3.1
NP compared to C	Proteus mirabilis	4.3	x 41
	Gilliamella apicola	3.9	x 2.1
	Morganella morganii	2.6	undetected in C
	Lactobacillus kimbladii	3.1	÷ 14
NP compared to N	Bifidobacterium asteroides	3.7	x 3.1
	Klebsiella oxytoca	3.6	x 5.2
	Bombilactobacillus mellifer	2.2	x 7.4
	Bombilactobacillus mellis	2.8	x 8.4
	Gottschalkia acidurici	2.4	undetected in NP
	Bartonella apis	4.8	÷ 1.3
NT compared to C	Proteus mirabilis	3.9	x 20
	Lactobacillus kimbladii	3.3	÷ 5
NT compared to N	Bombilactobacillus mellifer	2.9	x 6.6
	Bombilactobacillus mellis	3.1	x 11
	Bifidobacterium coryneforme	3.8	x 1.9
	Bifidobacterium asteroides	3.5	x 2.5
	Apilactobacillus kunkeei	3.5	x 1.7
	Lactobacillus kullabergensis	3.5	x 11
	Frischella perrara	3.8	÷ 1.9
	Bartonella apis	4.7	÷ 1.2
TP compared to C	Bifidobacterium asteroides	3.6	÷ 1.4
	Fructobacillus fructosus	3.5	÷ 2.8
	Lactobacillus kimbladii	3.3	÷ 6.4
TP compared to T	Fructobacillus fructosus	3.2	÷ 2.3
	Bombilactobacillus mellifer	2.1	÷ 1.49
